# Supplementary material for: Multifunctional, fluorescent DNA-derived carbon dots for biomedical applications: bioimaging, luminescent DNA hydrogels, and dopamine detection
Source: Royal Society of Chemistry journal article supplement (doi:10.1039/c9tb01863h), 2020-01-01
Supplement: c9tb01863h1.pdf [file c9tb01863h1.pdf]

### Supplementary Information

Multifunctional, fluorescent DNA derived Carbon dots for biomedical applications: bioimaging, luminescent DNA hydrogels and dopamine detection

Pankaj Kumar Pandey<sup>1</sup>, Preeti<sup>2</sup>, Kamla Rawat<sup>3</sup>, Tulika Prasad<sup>2,4\*</sup> and H. B. Bohidar<sup>1,2\*</sup>

<sup>1</sup>School of Physical Sciences, Jawaharlal Nehru University, New Delhi, India

<sup>2</sup>Special Centre for Nanoscience, Jawaharlal Nehru University, New Delhi, India

<sup>3</sup>Department of Chemistry, School of Chemical and Life Science, Jamia Hamdard, New Delhi, India

<sup>4</sup>Advanced Instrumentation Research and Facility, Jawaharlal Nehru University, New Delhi,

Determination of Quantum Yield: QY was determined using DAPI (4',6-Diamidino-2-Phenylindole, Dilactate) as the reference sample (QY<sub>r</sub> in water =43%). QY of the samples were calculated using the following formula,

$$QY = (F A_r QY_r) / (F_r A)$$

where F and A represents the integrated fluorescence intensity and absorbance of the sample and F<sub>r</sub> and A<sub>r</sub> represents the corresponding reference values, which yields QY= 40%. Yes, Authors tested the fluorescence spectra of the samples over a week and did not find significant change.

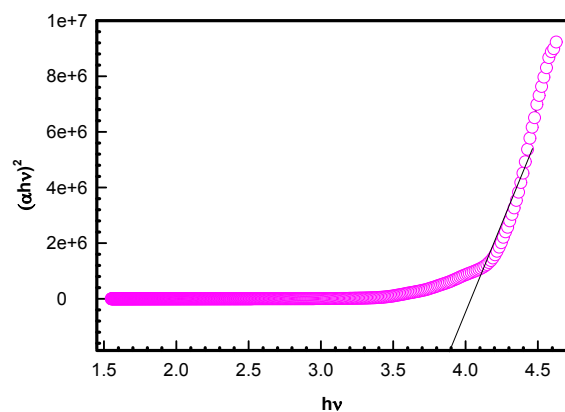

**Fig S1.** Band gap determination from Tauc plot.

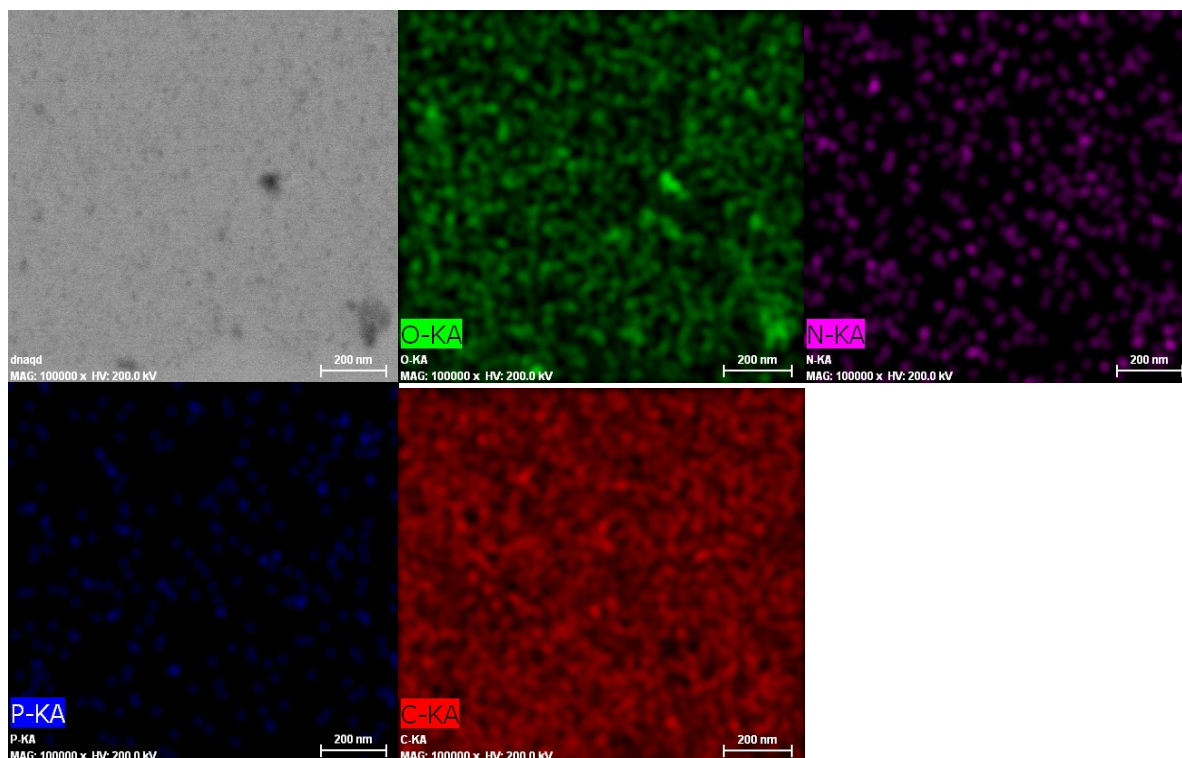

**Fig S2.** TEM EDX images from DNA derived carbon dots.

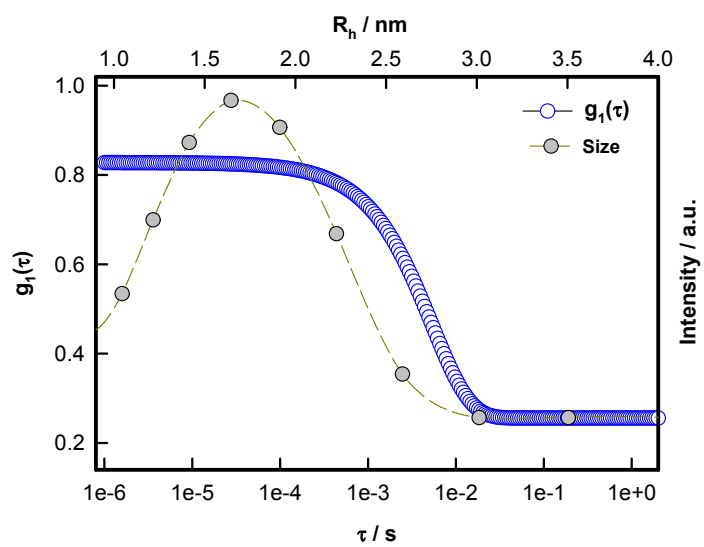

**Fig S3.** DLS correlation function from carbon dot dispersion.

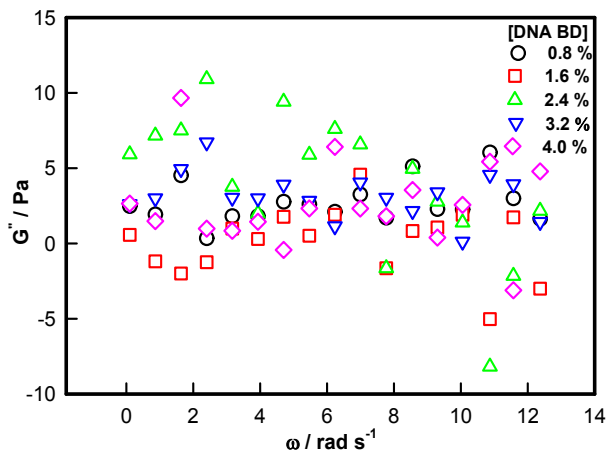

Fig S4.  $G''$  data for carbon dot based DNA hydrogel

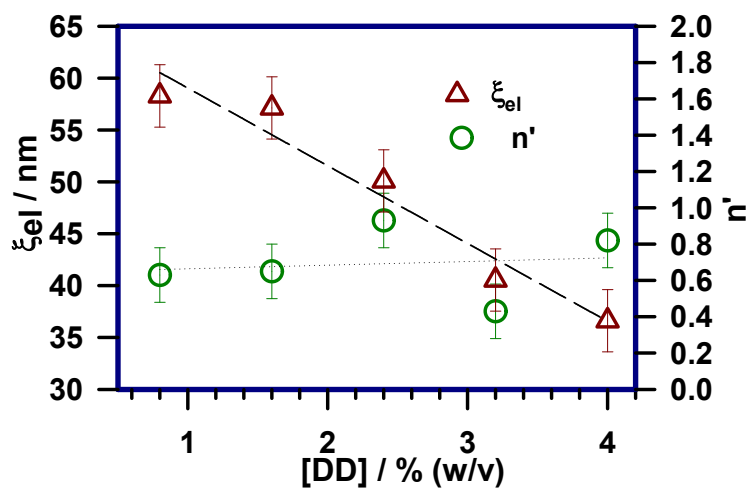

Fig S5. Variation of viscoelastic length and power law exponent  $n'$  for DNA-Carbon Dot hydrogel with different DD (C-Dot) concentration.

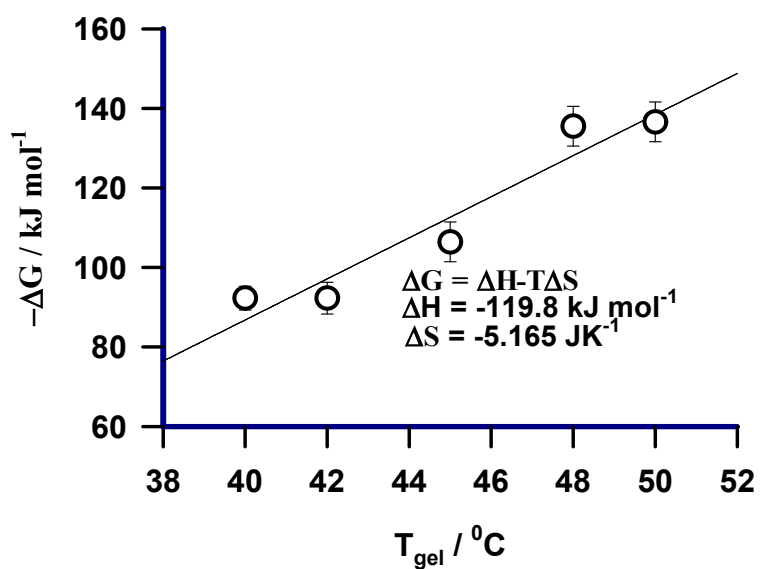

**Fig S6.** Variation of change in Gibb's free energy for DNA-C-Dot hydrogel with different  $T_{\text{gel}}$ .

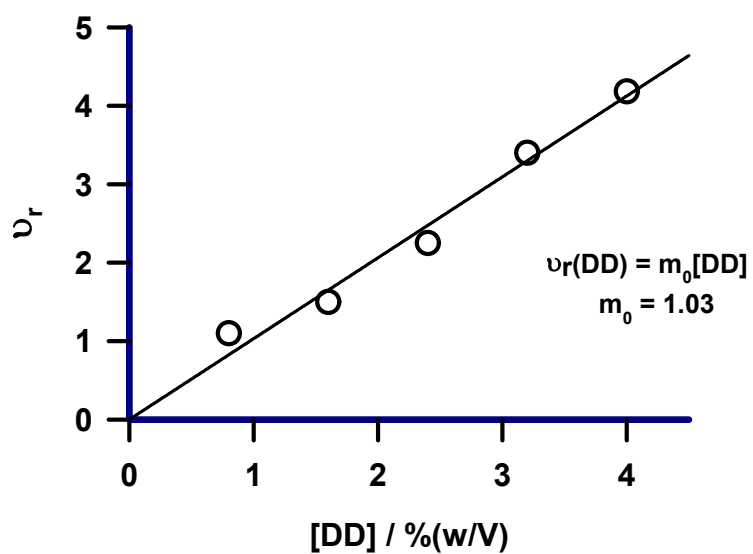

**Fig S7.** Relative network density of DNA-C-Dot hydrogel with dot (DD) concentration.
